# Supplementary material
Source: publisher figshare collection journal article supplement (https://springernature.figshare.com/articles/dataset/_/9766613)
Supplement: Supplementary file 1 [file 1]

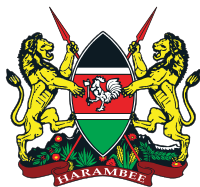

MINISTRY OF HEALTH

# HIV SELF RISK CHECKER

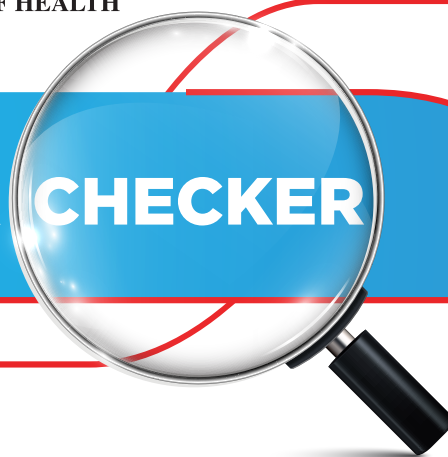

|     |                                                                                                   |                                                                                        |
|-----|---------------------------------------------------------------------------------------------------|----------------------------------------------------------------------------------------|
| 1.  | Are you sexually active?                                                                          | No <input type="checkbox"/> Yes <input type="checkbox"/>                               |
| 2.  | In the last three months have you ever had more than one sexual partner?                          | No <input type="checkbox"/> Yes <input type="checkbox"/>                               |
| 3.  | Do you know the status of your current sexual partner(s)                                          | No <input type="checkbox"/> Yes <input type="checkbox"/> Some <input type="checkbox"/> |
| 4.  | Did you use a condom correctly and consistently with your sexual partner(s) in the last 3 months? | No <input type="checkbox"/> Yes <input type="checkbox"/>                               |
| 5.  | Have you had an Sexually Transmitted Infection in the last 3 months                               | No <input type="checkbox"/> Yes <input type="checkbox"/>                               |
| 6.  | Have you engaged in: sex in exchange for money or other favors                                    | No <input type="checkbox"/> Yes <input type="checkbox"/>                               |
| 7.  | Within the last 3 months, have you experienced any form of violence (sexual, physical e.t.c)?     | No <input type="checkbox"/> Yes <input type="checkbox"/>                               |
| 8.  | Have you ever injected drugs?                                                                     | No <input type="checkbox"/> Yes <input type="checkbox"/>                               |
| 9.  | Have you used Post Exposure Prophylaxis (PEP) twice or more in the last 3 months?                 | No <input type="checkbox"/> Yes <input type="checkbox"/>                               |
| 10. | Do you rate your chances of getting HIV as High/Medium?                                           | No <input type="checkbox"/> Yes <input type="checkbox"/>                               |

**Criteria for further support; a response of YES to any or all of the above questions, kindly visit a health facility for support or Call Uliza NASCOP Toll free Number 0800724848**
